# Supplementary material for: Recombinant Bifidobacterium longum Carrying Endostatin Protein Alleviates Dextran Sodium Sulfate-Induced Colitis and Colon Cancer in Rats
Source: Front Microbiol. 2022 Jun 30;13:927277. doi: 10.3389/fmicb.2022.927277 (PMC9280188; doi:10.3389/fmicb.2022.927277)
Supplement: Supplementary file 1 [file Data_Sheet_1.XLSX]

## Sheet: Body weight
3% DSS-induced colitis in mice
Body weihght (fold of initial weight )
The first experiment	Control	Model	B.longum	B.longum-Endo
0 day	1	1	1	1
1 day	1.01634	1.023	1.0215	1.016
2 day	1.0163	1.02	1.0254	1.02538
3 day	1.0227	0.98	1.0292	0.984772
4 day	1.04	0.9	1.0264	0.969543
5 day	1.06	0.85	0.9802	0.908629
6 day	1.08	0.8	0.9283	0.852792
7 day	1.1	0.76	0.8765	0.832183
Body weihght (fold of initial weight )
The second experiment	Control	Model	B.longum	B.longum-Endo
0 day	1	1	1	1
1 day	0.9893	1.012	1.02	1.025
2 day	1.00532	1.015	1.0244	1.01523
3 day	1.02	0.976	1.0378	0.989848
4 day	1.035	0.925	1.0207	0.964467
5 day	1.053	0.881	0.9609	0.893401
6 day	1.089	0.823	0.9274	0.873249
7 day	1.101	0.789	0.8795	0.852792
Body weihght (fold of initial weight )
The thrid experiment	Control	Model	B.longum	B.longum-Endo
0 day	1	1	1	1
1 day	1.0221	1	1.02	1.02
2 day	1.00535	1	1.0115	1.009
3 day	1.012	0.92	1.0266	0.965174
4 day	1.029	0.94	0.984	0.910448
5 day	1.048	0.87	0.96	0.895522
6 day	1.075	0.843	0.9031	0.875622
7 day	1.0979	0.756	0.8853	0.840597

## Sheet: DAI
3% DSS-induced colitis in mice	Disease activity index(DAI)
	The first experiment (day）	Control	Model	B.longum	B.longum-Endo
	0 day	0	0	0	0
	1 day	0	0	0	0
	2 day	0	0	0	0
	3 day	0	0	0	0.7
	4 day	0	1.5	0.7	1
	5 day	0	3	1	1.3
	6 day	0	4	1	1.5
	7 day	0	4	2.4	2.5
	Disease activity index(DAI)
	The second experiment	Control	Model	B.longum	B.longum-Endo
	0	0	0	0	0
	1	0	0	0	0
	2	0	0	0	0
	3	0	1	0.9	1
	4	0	1.6	1.1	1.2
	5	0	2.5	1.2	1.2
	6	0	3.5	1.5	1.6
	7	0	3.8	2.2	2.5
	Disease activity index(DAI)
	The thrid experiment	Control	Model	B.longum	B.longum-Endo
	0	0	0	0	0
	1	0	0	0	0
	2	0	0	0	0.5
	3	0	1	0	1
	4	0	2	0.9	1.3
	5	0	3	1.3	1.4
	6	0	3.3	1.6	1.6
	7	0	3.7	2.3	2.9

## Sheet: Colon length
3% DSS-induced colitis in mice
Colon length(cm)-The first experiment
Control	Model	B.longum	B.longum-Endo
9	5.29	7.45	6.8
7.8	4.62	7.1	7.3
8.3	4.7	6.21	6.6
Colon length(cm)-The second experiment
Control	Model	B.longum	B.longum-Endo
8.55	4.92	7.3	7.2
7.9	5.2	6.8	7.16
8.5	4.3	6.5	7
Colon length(cm)-The thrid experiment
Control	Model	B.longum	B.longum-Endo
8.25	5.05	7.4	6.6
8.4	4.92	7.3	6.75
8.55	4.62	7.22	6.75
8.43	4.99	7.1	6.63
8.9	5.26	6.63	6.4
8.85	5.23	6.9	6.8
8.9	5.5	6.8	7.2
8.1	5.29	7.15	6.5

## Sheet: MPO
	The first experiment					The second experiment					The thrid experiment
MPO activity (U/mL)	Control	Model	B.longum	B.longum-Endo		Control	Model	B.longum	B.longum-Endo		Control	Model	B.longum	B.longum-Endo
7 day	0.000431	0.023406	0.011	0.01601		0.00074	0.02705	0.013	0.0159		0.00087	0.0227	0.01426	0.013619
12day	2e-05	0.02063	0.008	0.0062		0.0002	0.014779	0.015929	0.0098		0.006	0.01615	0.005	0.0052

## Sheet: RT-PCR
	The first experiment					The second experiment					The thrid experiment
Relative ZO-1 mRNA expression	Control	Model	B.longum	B.longum-Endo		Control	Model	B.longum	B.longum-Endo			Control	Model	B.longum	B.longum-Endo
7 day	1.01	0.143	0.543	0.456		0.901	0.1301	0.58	0.605			1.059	0.138	0.6	0.59
12day	0.954	0.42	0.75	0.8		0.992	0.386	0.88	0.91			1.052	0.401	0.7	0.75
	The first experiment					The second experiment						The thrid experiment
Relative Occludin mRNA expression	Control	Model	B.longum	B.longum-Endo		Control	Model	B.longum	B.longum-Endo			Control	Model	B.longum	B.longum-Endo
7 day	0.949	0.42	0.64	0.58		0.985	0.35	0.58	0.62			1.1	0.472	0.61	0.6
12day	0.872	0.62	0.89	0.88		1.003	0.7	0.92	0.94			1.105	0.63	0.78	0.9
	The first experiment					The second experiment						The thrid experiment
RelativeTNF-α mRNA expression	Control	Model	B.longum	B.longum-Endo		Control	Model	B.longum	B.longum-Endo			Control	Model	B.longum	B.longum-Endo
7 day	1.1	4.80768	1.56073	1.35		0.95	2.89711	1.75816	1.96			1.03	2.95286	1.65911	1.5
12day	1.04	1.58	0.97	1.02		0.853462	1.62	1.34	0.98			1.2	1.7	1.23	1.07
	The first experiment					The second experiment						The thrid experiment
Relative IL-1β mRNA expression	Control	Model	B.longum	B.longum-Endo		Control	Model	B.longum	B.longum-Endo			Control	Model	B.longum	B.longum-Endo
7 day	1.2	5.29	2.5	2.7		1.04	4.83	1.96	1.9			0.9	5.12	2.2	2
12day	1.1	2.83	2.05	1.29		1	3.25	1.69	1.78			0.93	3.12	1.7	1.2
	The first experiment					The second experiment						The thrid experiment
Relative IL-6 mRNA expression	Control	Model	B.longum	B.longum-Endo		Control	Model	B.longum	B.longum-Endo			Control	Model	B.longum	B.longum-Endo
7 day	1.03	29.75	16.9	16.95		1.0027	35.692	12.23	18.1018			1.0803	27.928	13.45	16.9985
12day	1.048	16.82	4.54	4.35		1.0672	14.36	2.63	2.62			1.084	12.5736	3.05	2.51

## Sheet: Body weight-2
AOM/DSS-induced CRC (Body weight)
Time (weeks)	Control
0	23.3	23.5	23.6	24	24.6	24.9
3	27	26.8	27	26.9	25.9	26.8
6	28.9	29	28	28.4	28.2	28.4
9	30.6	29.7	30.2	30	30.6	29.5
12	32	31.6	31.7	31.3	31.7	32.4
15	32.3	31.4	31.5	33	31.7	33
Time (weeks)	Model
0	23.5	24.2	23.6	23.7	24.7	22.7	24	24
3	24.3	25.3	24.8	24.5	25.4	23.9	25.2	22.7
6	25.8	26.6	25.5	26.8	25.5	27.1	24.3	26.7
9	26.9	27.4	28.1	26.4	28.6	27.2	27	25.7
12	26.1	25.1	28	28	26.9	27.8	27.7	27.8
15	27.2	27.3	26.9	28.9	28	28.2	27.6	25.2
Time (weeks)	B.longum
0	23.4	23.9	23.3	23.9	23.8	23	24.1	26.1
3	24.1	25.7	24.8	24.9	25.2	25.2	24	28.5
6	28.7	27.4	26.8	25.6	28.6	25.2	26	28.3
9	31.2	28.2	29.2	26.6	29.1	26.1	27.6	29.2
12	31.9	28.4	26.5	26.9	29.8	27.2	27.6	29.8
15	29.8	29.5	28.8	27	28.2	27.6	27.4	30.5
Time (weeks)	B.longum-Endo
0	23.1	23.5	23.5	23.9	23.6	24.2	23.5	23.6
3	25.8	25.7	26.4	24.9	26.4	24.2	25.2	25.8
6	27.9	27.7	26.3	25.7	27.9	25.8	27.7	28.9
9	30.7	29.9	29.2	26.8	29.4	26.9	29.7	31.3
12	30.6	29.8	29.7	29.1	28.6	29.5	31	30
15	30.5	30.6	29.9	32.2	29.3	28.6	31.5	31

## Sheet: intestinal microbiota
The relative abundance of intestinal microbiota
The relative abundance of microbioaat genus level (TOP30)	Control-1	Control-2	Control-3	Model-1	Model-2	Model-3	Model-4	B.longum-1	B.longum-2	B.longum-3	B.longum-4	B.longum-Endo-1	B.longum-Endo-2	B.longum-Endo-3	B.longum-Endo-4
Lactobacillus	0.180767	0.112177	0.101238	0.0578697	0.0978106	0.03942	0.17665	0.320485	0.377867	0.204493	0.130728	0.224472	0.201805	0.322793	0.235478
Dubosiella	0.0491489	0.028834	0.0194411	0.0735974	0.099222	0.102851	0.0682708	0.175071	0.30022	0.105943	0.13182	0.0948028	0.200242	0.390032	0.239225
Bifidobacterium	0.010082	0.004402	0.00578	0.001748	0.006755	0.009208	0.009947	0.033337	0.016685	0.003629	0.014047	0.022401	0.039258	0.010065	0.036311
Lachnospiraceae_NK4A136_group	0.00685564	0.00687245	0.00861997	0.003932	0.002806	0.00899	0.088065	0.03742	0.012838	0.058945	0.017828	0.059852	0.01687	0.008318	0.006654
Desulfovibrio	0.0292037	0.0183321	0.0393359	0.0599365	0.0559206	0.0705056	0.0300439	0.0240956	0.00457043	0.0313209	0.0250197	0.00886	0.0055282	0.00472166	0.00833431
Allobaculum	0.000554501	0.000856956	0.000151227	0.000806546	8.4e-05	8.4e-05	0.00278931	0.00122662	0.0060827	0.0121822	0.0577185	0.00683884	0.00554501	0.0144506	0.0173071
Ileibacterium	0.008754	0.003949	0.005209	0.000622	0.001697	0.000235	0.000907	0.042713	0.014871	0.030699	0.009275	0.014131	0.020029	0.050392	0.004822
Helicobacter	0.00875439	0.00213399	0.00193235	0.0295902	0.0363618	0.0170551	0.0405122	0.0111404	0.0110564	0.00364626	0.00399913	0.00475526	0.00423437	0.00673802	0.00215079
Coriobacteriaceae_UCG-002	0.0027389	0.0010922	0.00173071	0.00389831	0.00287332	0.00257087	0.00532657	0.00102499	0.00267169	0.00349504	0.00235243	0.00267169	0.00179793	0.029607	0.0217095
Mucispirillum	0.00137785	0.00443601	0.0071581	0.00784703	0.00910725	0.00117621	0.00320938	0.00477207	0.000722531	0.000756137	0.00320938	0.00943895	0.0016635	0.000957774	0.00171391
Colidextribacter	0.00159629	0.00317578	0.00278931	0.00226841	0.00193235	0.00191555	0.0129888	0.0286156	0.00169711	0.0115101	0.00618352	0.00154588	0.00154588	0.00357905	0.00186514
Candidatus_Saccharimonas	0.0268177	0.0135433	0.023373	0.00809907	0.0260951	0.0272882	0.00196596	0.00409994	0.00247005	0.00186514	0.00115941	0.0016635	0.00241964	0.00211718	0.00151227
Turicibacter	0.000437	0.00047	0.000807	0.004755	0.007343	0.000924	0.00121	0.022936	0.010872	0.00284	0.004722	0.001378	0.001647	0.000958	0.006318
Alistipes	0.011174	0.0113421	0.0104179	0.0142322	0.0112076	0.0189538	0.0211046	0.00734293	0.00161309	0.00567943	0.00870398	0.00527616	0.00490649	0.00253726	0.00554501
Bacteroides	0.0049737	0.00292373	0.000571304	0.000302455	0.000184834	0.00247005	0.00152908	0.0022012	0.00818309	0.00586426	0.00458723	0.00339422	0.00557643	0.00712449	0.00920807
Alloprevotella	0.00060491	0.00179793	0.00159629	0.000873759	0.000436879	0.00038647	0.00038647	0.00136105	0.000756137	0.00201637	0.000940971	0.00199956	0.00480349	0.000504092	0.00352864
Anaeroplasma	0.000638516	0.00137785	0.000268849	8.4e-05	8.4e-05	0.000117621	0.000924168	0.000352864	0.00149547	0.000571304	0.000940971	0.000907365	0.00099138	0.00228303	0.000319258
Parabacteroides	0.00294053	0.00204997	0.00171391	0.00420076	0.00841833	0.00260447	0.00139465	0.00351184	0.0032934	0.00199956	0.00204997	0.00962815	0.00719171	0.00569623	0.0112412
Odoribacter	0.011157	0.009326	0.007393	0.004083	0.005948	0.00694	0.003512	0.009326	0.000218	0.009544	0.004167	0.001579	0.001579	0.002033	0.00168
[Eubacterium]_xylanophilum_group	0.001428	0.001647	0.002134	0.002	0.004302	0.000907	0.001798	0.010888	0.001294	0.005948	0.001529	0.002604	0.000437	0.001428	0.000773
Dorea	0.000235	0.000185	0.000403	0.000252	0.002352	6.72e-05	0.000202	0.010149	0.000353	0.000437	0.000151	0.000336	0.000269	0.002302	0.003529
[Eubacterium]_ruminantium_group	0.000168031	0.00159629	0.00104179	3.36e-05	0.000856956	0.000184834	0.00452002	0.000336061	0.00312537	0.00174752	0.00613311	0.00949372	0.00373028	0.00137785	0.00100818
Clostridium_sensu_stricto_1	0.000268849	0	0	0.000100818	0	1.68e-05	0.00038647	3.36e-05	0.000873759	0.000638516	0.000352864	0.00798145	0.00204997	0.000369667	0.000537698
Brachyspira	0.000100818	1.68e-05	6.72e-05	0.000453682	0.0071413	0	0.000504092	0.000100818	1.68e-05	1.68e-05	0.000554501	0.00038647	3.36e-05	0	0.000957774
Faecalibacterium	0	0	3.36e-05	0	0.000235243	5.04e-05	5.04e-05	0	1.68e-05	0	0	0.00688925	3.36e-05	0.000336061	0.000117621
Gardnerella	0.00344463	0	0	0.00260447	0.000789743	0	0.000369667	0.000537698	0.00188194	0.00258767	0.000470485	0.00038647	0.000184834	0.00038647	0.0066204
Enterorhabdus	0.00544419	0.00428478	0.00393191	0.00295734	0.00505772	0.00645237	0.00490649	0.00307496	0.00255406	0.00445281	0.00655319	0.00337741	0.0016635	0.0032934	0.00280611
Lachnoclostridium	0.00077294	0.00181473	0.00228522	0.0016299	0.000688925	0.00625074	0.00193235	0.002218	0.000487288	0.00077294	0.00257087	0.00141146	0.000352864	0.000890562	0.000537698
Faecalibaculum	0.000487288	0.000235243	0.000168031	0.000151227	0.000856956	0.000151227	0.000235243	0.00609951	0.00572984	0.00272209	0.00100818	0.000705728	0.000336061	0.002924	0.000655319
Parasutterella	0.00120982	0.00225161	0.0010922	0.000806546	0.000890562	0.000739334	0.00208358	0.00038647	0.000756137	0.000688925	0.00306716	0.00364626	0.00302455	0.00504828	0.00196596
